# Supplementary material
Source: publisher figshare collection journal article supplement (https://acs.figshare.com/ndownloader/files/5197411)
Supplement: Supplementary file 1 [file 5197411]

 
data_p75tsag2p 
 
_audit_creation_method            SHELXL-97 
_audit_update_record 
; 
2003-06-03   text and data added. dws 
; 
 
_chemical_name_systematic 
; 
? 
; 
 
_chemical_name_common            ? 
_chemical_melting_point          ? 
_chemical_formula_moiety         'C156 H114 N12 O13 Zn7' 
_chemical_formula_sum 
 'C156 H114 N12 O13 Zn7' 
_chemical_formula_structural     ? 
_chemical_formula_weight          2822.18 
 
_chemical_absolute_configuration . 
_chemical_formula_analytical     ? 
_chemical_compound_source        ? 
 
loop_ 
 _atom_type_symbol 
 _atom_type_description 
 _atom_type_scat_dispersion_real 
 _atom_type_scat_dispersion_imag 
 _atom_type_scat_source 
 'C'  'C'   0.0181   0.0091 
 'International Tables Vol C Tables 4.2.6.8 and 6.1.1.4' 
 'H'  'H'   0.0000   0.0000 
 'International Tables Vol C Tables 4.2.6.8 and 6.1.1.4' 
 'N'  'N'   0.0311   0.0180 
 'International Tables Vol C Tables 4.2.6.8 and 6.1.1.4' 
 'O'  'O'   0.0492   0.0322 
 'International Tables Vol C Tables 4.2.6.8 and 6.1.1.4' 
 'Zn'  'Zn'  -1.5491   0.6778 
 'International Tables Vol C Tables 4.2.6.8 and 6.1.1.4' 
 
_symmetry_cell_setting           'Cubic' 
_symmetry_space_group_name_H-M   'F d -3  ' 
_symmetry_space_group_name_Hall  '-F 2uw 2vw 3 ' 
 
loop_ 
 _symmetry_equiv_pos_as_xyz 
 'x, y, z' 
 '-x+1/4, -y+1/4, z' 
 '-x+1/4, y, -z+1/4' 
 'x, -y+1/4, -z+1/4' 
 'z, x, y' 
 'z, -x+1/4, -y+1/4' 
 '-z+1/4, -x+1/4, y' 
 '-z+1/4, x, -y+1/4' 
 'y, z, x' 
 '-y+1/4, z, -x+1/4' 
 'y, -z+1/4, -x+1/4' 
 '-y+1/4, -z+1/4, x' 
 'x, y+1/2, z+1/2' 
 '-x+1/4, -y+3/4, z+1/2' 
 '-x+1/4, y+1/2, -z+3/4' 
 'x, -y+3/4, -z+3/4' 
 'z, x+1/2, y+1/2' 
 'z, -x+3/4, -y+3/4' 
 '-z+1/4, -x+3/4, y+1/2' 
 '-z+1/4, x+1/2, -y+3/4' 
 'y, z+1/2, x+1/2' 
 '-y+1/4, z+1/2, -x+3/4' 
 'y, -z+3/4, -x+3/4' 
 '-y+1/4, -z+3/4, x+1/2' 
 'x+1/2, y, z+1/2' 
 '-x+3/4, -y+1/4, z+1/2' 
 '-x+3/4, y, -z+3/4' 
 'x+1/2, -y+1/4, -z+3/4' 
 'z+1/2, x, y+1/2' 
 'z+1/2, -x+1/4, -y+3/4' 
 '-z+3/4, -x+1/4, y+1/2' 
 '-z+3/4, x, -y+3/4' 
 'y+1/2, z, x+1/2' 
 '-y+3/4, z, -x+3/4' 
 'y+1/2, -z+1/4, -x+3/4' 
 '-y+3/4, -z+1/4, x+1/2' 
 'x+1/2, y+1/2, z' 
 '-x+3/4, -y+3/4, z' 
 '-x+3/4, y+1/2, -z+1/4' 
 'x+1/2, -y+3/4, -z+1/4' 
 'z+1/2, x+1/2, y' 
 'z+1/2, -x+3/4, -y+1/4' 
 '-z+3/4, -x+3/4, y' 
 '-z+3/4, x+1/2, -y+1/4' 
 'y+1/2, z+1/2, x' 
 '-y+3/4, z+1/2, -x+1/4' 
 'y+1/2, -z+3/4, -x+1/4' 
 '-y+3/4, -z+3/4, x' 
 '-x, -y, -z' 
 'x-1/4, y-1/4, -z' 
 'x-1/4, -y, z-1/4' 
 '-x, y-1/4, z-1/4' 
 '-z, -x, -y' 
 '-z, x-1/4, y-1/4' 
 'z-1/4, x-1/4, -y' 
 'z-1/4, -x, y-1/4' 
 '-y, -z, -x' 
 'y-1/4, -z, x-1/4' 
 '-y, z-1/4, x-1/4' 
 'y-1/4, z-1/4, -x' 
 '-x, -y+1/2, -z+1/2' 
 'x-1/4, y+1/4, -z+1/2' 
 'x-1/4, -y+1/2, z+1/4' 
 '-x, y+1/4, z+1/4' 
 '-z, -x+1/2, -y+1/2' 
 '-z, x+1/4, y+1/4' 
 'z-1/4, x+1/4, -y+1/2' 
 'z-1/4, -x+1/2, y+1/4' 
 '-y, -z+1/2, -x+1/2' 
 'y-1/4, -z+1/2, x+1/4' 
 '-y, z+1/4, x+1/4' 
 'y-1/4, z+1/4, -x+1/2' 
 '-x+1/2, -y, -z+1/2' 
 'x+1/4, y-1/4, -z+1/2' 
 'x+1/4, -y, z+1/4' 
 '-x+1/2, y-1/4, z+1/4' 
 '-z+1/2, -x, -y+1/2' 
 '-z+1/2, x-1/4, y+1/4' 
 'z+1/4, x-1/4, -y+1/2' 
 'z+1/4, -x, y+1/4' 
 '-y+1/2, -z, -x+1/2' 
 'y+1/4, -z, x+1/4' 
 '-y+1/2, z-1/4, x+1/4' 
 'y+1/4, z-1/4, -x+1/2' 
 '-x+1/2, -y+1/2, -z' 
 'x+1/4, y+1/4, -z' 
 'x+1/4, -y+1/2, z-1/4' 
 '-x+1/2, y+1/4, z-1/4' 
 '-z+1/2, -x+1/2, -y' 
 '-z+1/2, x+1/4, y-1/4' 
 'z+1/4, x+1/4, -y' 
 'z+1/4, -x+1/2, y-1/4' 
 '-y+1/2, -z+1/2, -x' 
 'y+1/4, -z+1/2, x-1/4' 
 '-y+1/2, z+1/4, x-1/4' 
 'y+1/4, z+1/4, -x' 
 
_cell_length_a                    51.1237(12) 
_cell_length_b                    51.1237(12) 
_cell_length_c                    51.1237(12) 
_cell_angle_alpha                 90.00 
_cell_angle_beta                  90.00 
_cell_angle_gamma                 90.00 
_cell_volume                      133619(5) 
_cell_formula_units_Z             16 
_cell_measurement_temperature     295(2) 
_cell_measurement_reflns_used     942 
_cell_measurement_theta_min        2.4 
_cell_measurement_theta_max       28.1 
_exptl_crystal_description       'prism' 
_exptl_crystal_colour            'purple' 
_exptl_crystal_size_max          0.2 
_exptl_crystal_size_mid          0.15 
_exptl_crystal_size_min          0.15 
_exptl_crystal_density_meas      'not measured' 
_exptl_crystal_density_diffrn     0.561 
_exptl_crystal_density_method    ? 
_exptl_crystal_F_000              23168 
_exptl_crystal_id                p75tsag2p 
 
_exptl_crystal_preparation 
; 
The data crystal was mounted using mother liquor in a 0.3 mm capillary. 
; 
 
_exptl_absorpt_coefficient_mu     0.768 
_exptl_absorpt_correction_type   'multi-scan' 
_exptl_absorpt_correction_T_min  0.522 
_exptl_absorpt_correction_T_max  0.999 
_exptl_absorpt_process_details   '(Bruker, 2001)' 
 
_exptl_special_details 
; 
 ? 
; 
 
_diffrn_ambient_temperature      295(2) 
_diffrn_radiation_wavelength      1.54178 
_diffrn_radiation_wavelength_id  p75tsag2p 
_diffrn_radiation_type           'CuK\a' 
_diffrn_radiation_source         'rotating copper anode' 
_diffrn_radiation_monochromator  'graphite' 
_diffrn_measurement_device_type   ? 
_diffrn_measurement_device       'Siemens P4/HiStar' 
_diffrn_measurement_method       'profile data from \f scans' 
 
_diffrn_detector_area_resol_mean  ? 
_diffrn_standards_number         0 
_diffrn_standards_interval_count  ? 
_diffrn_standards_interval_time  0 
 
_diffrn_standards_decay_%        0 
_diffrn_reflns_number            14960 
 
_diffrn_reflns_av_R_equivalents   0.1516 
_diffrn_reflns_av_sigmaI/netI     0.0949 
_diffrn_reflns_limit_h_min        -32 
_diffrn_reflns_limit_h_max        30 
_diffrn_reflns_limit_k_min        -34 
_diffrn_reflns_limit_k_max        27 
_diffrn_reflns_limit_l_min        -33 
_diffrn_reflns_limit_l_max        21 
_diffrn_reflns_theta_min          2.99 
_diffrn_reflns_theta_max          30.95 
_reflns_number_total              1727 
_reflns_number_gt                 848 
_reflns_threshold_expression      >2sigma(I) 
 
_computing_data_collection       'SMART V5.625 (Bruker, 2001)' 
_computing_cell_refinement       'SAINT V6.22 (Bruker, 2001)' 
_computing_data_reduction        'SAINT V6.22 (Bruker, 2001)' 
_computing_structure_solution    'SHELXTL V6.10 (Bruker, 2001)' 
_computing_structure_refinement  'SHELXTL V6.10 (Bruker, 2001)' 
_computing_molecular_graphics    'SHELXTL V6.10 (Bruker, 2001)' 
_computing_publication_material  'CIFTAB (Sheldrick, 2001)' 
 
_refine_special_details 
; 
? 
; 
 
_refine_ls_structure_factor_coef  Fsqd 
_refine_ls_matrix_type            full 
_refine_ls_weighting_scheme       calc 
_refine_ls_weighting_details 
 'calc w=1/[\s^2^(Fo^2^)+(0.2000P)^2^+0.0000P] where P=(Fo^2^+2Fc^2^)/3' 
_atom_sites_solution_primary      direct 
_atom_sites_solution_secondary    difmap 
_atom_sites_solution_hydrogens    geom 
_refine_ls_hydrogen_treatment    noref 
_refine_ls_extinction_method      none 
_refine_ls_extinction_coef        ? 
_refine_ls_number_reflns          1727 
_refine_ls_number_parameters      56 
_refine_ls_number_restraints      102 
_refine_ls_R_factor_all           0.2577 
_refine_ls_R_factor_gt            0.1922 
_refine_ls_wR_factor_ref          0.4868 
_refine_ls_wR_factor_gt           0.4629 
_refine_ls_goodness_of_fit_ref    1.598 
_refine_ls_restrained_S_all       1.644 
_refine_ls_shift/su_max           0.046 
_refine_ls_shift/su_mean          0.011 
 
loop_ 
 _atom_site_label 
 _atom_site_type_symbol 
 _atom_site_fract_x 
 _atom_site_fract_y 
 _atom_site_fract_z 
 _atom_site_U_iso_or_equiv 
 _atom_site_adp_type 
 _atom_site_occupancy 
 _atom_site_symmetry_multiplicity 
 _atom_site_calc_flag 
 _atom_site_refinement_flags 
 _atom_site_disorder_assembly 
 _atom_site_disorder_group 
O1 O 0.3750 0.8750 0.3750 0.041(19) Uiso 1 12 d SD . . 
Zn1 Zn 0.35328(6) 0.89672(6) 0.39672(6) 0.051(4) Uiso 1 3 d SD . . 
O2 O -0.1250 0.8750 0.3750 0.07(2) Uiso 1 12 d SD . . 
Zn2 Zn -0.10308(6) 0.85308(6) 0.35308(6) 0.053(4) Uiso 1 3 d SD . . 
Zn3 Zn 0.12515(12) 0.8707(3) 0.3676(2) 0.124(5) Uiso 0.50 1 d PD . . 
C1 C 0.19180(17) 0.8750 0.3750 0.282(9) Uiso 1 2 d SD . . 
N1 N 0.15345(16) 0.90295(13) 0.36333(9) 0.282(9) Uiso 1 1 d GD . . 
C2 C 0.18070(16) 0.89800(13) 0.36536(9) 0.282(9) Uiso 1 1 d GD . . 
C3 C 0.19420(15) 0.92041(14) 0.35608(11) 0.282(9) Uiso 1 1 d GD . . 
H3 H 0.2123 0.9224 0.3552 0.339 Uiso 1 1 calc R . . 
C4 C 0.17530(17) 0.93921(13) 0.34831(12) 0.282(9) Uiso 1 1 d GD . . 
H4 H 0.1788 0.9557 0.3415 0.339 Uiso 1 1 calc R . . 
C5 C 0.15012(16) 0.92842(14) 0.35280(10) 0.282(9) Uiso 1 1 d GD . . 
C6 C 0.12509(2) 0.93859(18) 0.34860(13) 0.282(9) Uiso 1 1 d D . . 
N2 N 0.09672(16) 0.90283(15) 0.36341(11) 0.282(9) Uiso 1 1 d GD . . 
C7 C 0.10020(17) 0.92829(15) 0.35290(13) 0.282(9) Uiso 1 1 d GD . . 
C8 C 0.07508(18) 0.93922(14) 0.34841(14) 0.282(9) Uiso 1 1 d GD . . 
H8 H 0.0717 0.9557 0.3416 0.339 Uiso 1 1 calc R . . 
C9 C 0.05607(16) 0.92052(14) 0.35614(14) 0.282(9) Uiso 1 1 d GD . . 
H9 H 0.0380 0.9226 0.3553 0.339 Uiso 1 1 calc R . . 
C10 C 0.06945(16) 0.89803(13) 0.36542(12) 0.282(9) Uiso 1 1 d GD . . 
C11 C 0.05843(18) 0.8750 0.3750 0.282(9) Uiso 1 2 d SD . . 
C21 C 0.22105(14) 0.8750 0.3750 0.110(7) Uiso 1 2 d SGD . . 
C22 C 0.23475(14) 0.8903(3) 0.3928(3) 0.110(7) Uiso 1 1 d GD . . 
H22 H 0.2257 0.9005 0.4048 0.132 Uiso 1 1 d G . . 
C23 C 0.26193(14) 0.8902(3) 0.3927(3) 0.110(7) Uiso 1 1 d G . . 
H23 H 0.2711 0.9004 0.4047 0.132 Uiso 1 1 d G . . 
C24 C 0.27540(14) 0.87485(5) 0.37484(5) 0.110(7) Uiso 1 2 d SGD . . 
C27 C 0.3048(2) 0.8750 0.3750 0.110(7) Uiso 1 2 d SD . . 
O3 O 0.31699(14) 0.8893(2) 0.3907(2) 0.110(7) Uiso 1 1 d D . . 
C28 C 0.02908(15) 0.8750 0.3750 0.155(9) Uiso 1 2 d SGD . . 
C29 C 0.01559(15) 0.8629(4) 0.3548(2) 0.155(9) Uiso 1 1 d GD . . 
H29 H 0.0247 0.8548 0.3413 0.186 Uiso 1 1 d G . . 
C30 C -0.01159(15) 0.8628(4) 0.3547(2) 0.155(9) Uiso 1 1 d G . . 
H30 H -0.0206 0.8547 0.3411 0.186 Uiso 1 1 d G . . 
C31 C -0.02527(15) 0.87492(5) 0.37491(5) 0.155(9) Uiso 1 2 d SGD . . 
C34 C -0.0547(2) 0.8750 0.3750 0.155(9) Uiso 1 2 d SD . . 
O5 O -0.06687(15) 0.8608(3) 0.3591(3) 0.155(9) Uiso 1 1 d D . . 
C35 C 0.12508(3) 0.96565(19) 0.33741(16) 0.49(2) Uiso 1 1 d GD . . 
C36 C 0.12800(7) 0.9693(2) 0.31065(17) 0.49(2) Uiso 1 1 d GD . . 
C37 C 0.12800(7) 0.9944(2) 0.30028(19) 0.49(2) Uiso 1 1 d G . . 
H37 H 0.1300 0.9969 0.2824 0.590 Uiso 1 1 calc R . . 
C38 C 0.12507(4) 1.0159(2) 0.3167(2) 0.49(2) Uiso 1 1 d GD . . 
C39 C 0.12215(8) 1.01224(19) 0.3435(2) 0.49(2) Uiso 1 1 d G . . 
H39 H 0.1202 1.0266 0.3544 0.590 Uiso 1 1 calc R . . 
C40 C 0.12216(7) 0.9871(2) 0.35383(18) 0.49(2) Uiso 1 1 d GD . . 
C41 C 0.13117(14) 0.9460(2) 0.29282(16) 0.49(2) Uiso 1 1 d GD . . 
H41A H 0.1329 0.9519 0.2751 0.737 Uiso 1 1 calc R . . 
H41B H 0.1161 0.9349 0.2943 0.737 Uiso 1 1 calc R . . 
H41C H 0.1465 0.9364 0.2978 0.737 Uiso 1 1 calc R . . 
C42 C 0.12506(4) 1.0432(2) 0.3054(3) 0.49(2) Uiso 1 1 d GD . . 
H42A H 0.1272 1.0423 0.2868 0.737 Uiso 1 1 calc R . . 
H42B H 0.1392 1.0531 0.3129 0.737 Uiso 1 1 calc R . . 
H42C H 0.1087 1.0516 0.3094 0.737 Uiso 1 1 calc R . . 
C43 C 0.11899(14) 0.9832(2) 0.38291(18) 0.49(2) Uiso 1 1 d GD . . 
H43A H 0.1172 0.9998 0.3913 0.737 Uiso 1 1 calc R . . 
H43B H 0.1341 0.9743 0.3897 0.737 Uiso 1 1 calc R . . 
H43C H 0.1037 0.9728 0.3862 0.737 Uiso 1 1 calc R . . 
 
_geom_special_details 
; 
 All esds (except the esd in the dihedral angle between two l.s. planes) 
 are estimated using the full covariance matrix.  The cell esds are taken 
 into account individually in the estimation of esds in distances, angles 
 and torsion angles; correlations between esds in cell parameters are only 
 used when they are defined by crystal symmetry.  An approximate (isotropic) 
 treatment of cell esds is used for estimating esds involving l.s. planes. 
; 
 
loop_ 
 _geom_bond_atom_site_label_1 
 _geom_bond_atom_site_label_2 
 _geom_bond_distance 
 _geom_bond_site_symmetry_2 
 _geom_bond_publ_flag 
O1 Zn1 1.923(5) 27 ? 
O1 Zn1 1.923(5) . ? 
O1 Zn1 1.923(5) 38_565 ? 
O1 Zn1 1.923(5) 16_565 ? 
Zn1 O3 1.918(7) 31_564 ? 
Zn1 O3 1.918(7) 22_655 ? 
Zn1 O3 1.918(7) . ? 
Zn1 Zn1 3.141(9) 27 ? 
Zn1 Zn1 3.141(9) 38_565 ? 
Zn1 Zn1 3.141(9) 16_565 ? 
O2 Zn2 1.941(5) 16_565 ? 
O2 Zn2 1.941(5) . ? 
O2 Zn2 1.941(5) 38_465 ? 
O2 Zn2 1.941(5) 27_455 ? 
Zn2 O5 1.918(7) 46 ? 
Zn2 O5 1.918(7) . ? 
Zn2 O5 1.918(7) 19_554 ? 
Zn3 Zn3 0.88(2) 16_565 ? 
Zn3 N1 2.123(14) 16_565 ? 
Zn3 N2 2.123(15) 16_565 ? 
Zn3 N1 2.204(14) . ? 
Zn3 N2 2.203(14) . ? 
C1 C2 1.395(5) 16_565 ? 
C1 C2 1.395(5) . ? 
C1 C21 1.496(7) . ? 
N1 C2 1.4196 . ? 
N1 C5 1.4196 . ? 
N1 Zn3 2.123(14) 16_565 ? 
C2 C3 1.4194 . ? 
C3 C4 1.4195 . ? 
C3 H3 0.9300 . ? 
C4 C5 1.4193 . ? 
C4 H4 0.9300 . ? 
C5 C6 1.398(6) . ? 
C6 C7 1.394(6) . ? 
C6 C35 1.497(7) . ? 
N2 C7 1.4193 . ? 
N2 C10 1.4194 . ? 
N2 Zn3 2.123(15) 16_565 ? 
C7 C8 1.4194 . ? 
C8 C9 1.4196 . ? 
C8 H8 0.9300 . ? 
C9 C10 1.4196 . ? 
C9 H9 0.9300 . ? 
C10 C11 1.394(5) . ? 
C11 C10 1.394(6) 16_565 ? 
C11 C28 1.500(7) . ? 
C21 C22 1.3894 . ? 
C21 C22 1.3894(15) 16_565 ? 
C22 C23 1.3895 . ? 
C22 H22 0.9295 . ? 
C23 C24 1.3875 . ? 
C23 H23 0.9295 . ? 
C24 C23 1.368(5) 16_565 ? 
C24 C27 1.504(9) . ? 
C27 O3 1.253(5) . ? 
C27 O3 1.253(5) 16_565 ? 
C28 C29 1.3893 . ? 
C28 C29 1.3893(14) 16_565 ? 
C29 C30 1.3894 . ? 
C29 H29 0.9295 . ? 
C30 C31 1.3934 . ? 
C30 H30 0.9297 . ? 
C31 C30 1.404(4) 16_565 ? 
C31 C34 1.505(9) . ? 
C34 O5 1.253(5) . ? 
C34 O5 1.253(5) 16_565 ? 
C35 C36 1.3893 . ? 
C35 C40 1.3898 . ? 
C36 C37 1.3892 . ? 
C36 C41 1.5094 . ? 
C37 C38 1.3896 . ? 
C37 H37 0.9300 . ? 
C38 C39 1.3894 . ? 
C38 C42 1.5094 . ? 
C39 C40 1.3892 . ? 
C39 H39 0.9300 . ? 
C40 C43 1.5093 . ? 
C41 H41A 0.9600 . ? 
C41 H41B 0.9600 . ? 
C41 H41C 0.9600 . ? 
C42 H42A 0.9600 . ? 
C42 H42B 0.9600 . ? 
C42 H42C 0.9600 . ? 
C43 H43A 0.9600 . ? 
C43 H43B 0.9600 . ? 
C43 H43C 0.9600 . ? 
 
loop_ 
 _geom_angle_atom_site_label_1 
 _geom_angle_atom_site_label_2 
 _geom_angle_atom_site_label_3 
 _geom_angle 
 _geom_angle_site_symmetry_1 
 _geom_angle_site_symmetry_3 
 _geom_angle_publ_flag 
Zn1 O1 Zn1 109.471(2) 27 . ? 
Zn1 O1 Zn1 109.471(2) 27 38_565 ? 
Zn1 O1 Zn1 109.471(1) . 38_565 ? 
Zn1 O1 Zn1 109.5 27 16_565 ? 
Zn1 O1 Zn1 109.5 . 16_565 ? 
Zn1 O1 Zn1 109.471(2) 38_565 16_565 ? 
O3 Zn1 O3 108.3(2) 31_564 22_655 ? 
O3 Zn1 O3 108.3(2) 31_564 . ? 
O3 Zn1 O3 108.3(2) 22_655 . ? 
O3 Zn1 O1 110.6(2) 31_564 . ? 
O3 Zn1 O1 110.6(2) 22_655 . ? 
O3 Zn1 O1 110.6(2) . . ? 
O3 Zn1 Zn1 75.4(2) 31_564 27 ? 
O3 Zn1 Zn1 123.0(4) 22_655 27 ? 
O3 Zn1 Zn1 124.9(3) . 27 ? 
O1 Zn1 Zn1 35.264(1) . 27 ? 
O3 Zn1 Zn1 124.9(3) 31_564 38_565 ? 
O3 Zn1 Zn1 75.4(2) 22_655 38_565 ? 
O3 Zn1 Zn1 123.0(4) . 38_565 ? 
O1 Zn1 Zn1 35.3 . 38_565 ? 
Zn1 Zn1 Zn1 60.0 27 38_565 ? 
O3 Zn1 Zn1 123.0(4) 31_564 16_565 ? 
O3 Zn1 Zn1 124.9(3) 22_655 16_565 ? 
O3 Zn1 Zn1 75.4(2) . 16_565 ? 
O1 Zn1 Zn1 35.264(1) . 16_565 ? 
Zn1 Zn1 Zn1 60.0 27 16_565 ? 
Zn1 Zn1 Zn1 60.0 38_565 16_565 ? 
Zn2 O2 Zn2 109.471(2) 16_565 . ? 
Zn2 O2 Zn2 109.472(2) 16_565 38_465 ? 
Zn2 O2 Zn2 109.5 . 38_465 ? 
Zn2 O2 Zn2 109.5 16_565 27_455 ? 
Zn2 O2 Zn2 109.471(2) . 27_455 ? 
Zn2 O2 Zn2 109.5 38_465 27_455 ? 
O5 Zn2 O5 108.8(2) 46 . ? 
O5 Zn2 O5 108.8(2) 46 19_554 ? 
O5 Zn2 O5 108.8(2) . 19_554 ? 
O5 Zn2 O2 110.2(2) 46 . ? 
O5 Zn2 O2 110.2(2) . . ? 
O5 Zn2 O2 110.2(2) 19_554 . ? 
Zn3 Zn3 N1 83.5(15) 16_565 16_565 ? 
Zn3 Zn3 N2 83.5(15) 16_565 16_565 ? 
N1 Zn3 N2 86.2(6) 16_565 16_565 ? 
Zn3 Zn3 N1 73.2(13) 16_565 . ? 
N1 Zn3 N1 91.4(4) 16_565 . ? 
N2 Zn3 N1 156.7(6) 16_565 . ? 
Zn3 Zn3 N2 73.2(13) 16_565 . ? 
N1 Zn3 N2 156.7(6) 16_565 . ? 
N2 Zn3 N2 90.9(4) 16_565 . ? 
N1 Zn3 N2 82.3(5) . . ? 
C2 C1 C2 132.0(11) 16_565 . ? 
C2 C1 C21 114.0(6) 16_565 . ? 
C2 C1 C21 114.0(5) . . ? 
C2 N1 C5 108.0 . . ? 
C2 N1 Zn3 122.2(4) . 16_565 ? 
C5 N1 Zn3 128.0(4) . 16_565 ? 
C2 N1 Zn3 120.2(4) . . ? 
C5 N1 Zn3 130.1(4) . . ? 
Zn3 N1 Zn3 23.3(6) 16_565 . ? 
C1 C2 C3 126.9(5) . . ? 
C1 C2 N1 125.1(5) . . ? 
C3 C2 N1 108.0 . . ? 
C2 C3 C4 108.0 . . ? 
C2 C3 H3 126.0 . . ? 
C4 C3 H3 126.0 . . ? 
C5 C4 C3 108.0 . . ? 
C5 C4 H4 126.0 . . ? 
C3 C4 H4 126.0 . . ? 
C6 C5 C4 131.4(6) . . ? 
C6 C5 N1 120.6(6) . . ? 
C4 C5 N1 108.0 . . ? 
C7 C6 C5 132.1(10) . . ? 
C7 C6 C35 114.2(6) . . ? 
C5 C6 C35 113.7(5) . . ? 
C7 N2 C10 108.0 . . ? 
C7 N2 Zn3 127.4(4) . 16_565 ? 
C10 N2 Zn3 122.8(4) . 16_565 ? 
C7 N2 Zn3 129.6(4) . . ? 
C10 N2 Zn3 120.8(4) . . ? 
Zn3 N2 Zn3 23.3(6) 16_565 . ? 
C6 C7 N2 121.4(6) . . ? 
C6 C7 C8 130.6(6) . . ? 
N2 C7 C8 108.0 . . ? 
C7 C8 C9 108.0 . . ? 
C7 C8 H8 126.0 . . ? 
C9 C8 H8 126.0 . . ? 
C10 C9 C8 108.0 . . ? 
C10 C9 H9 126.0 . . ? 
C8 C9 H9 126.0 . . ? 
C11 C10 N2 124.6(6) . . ? 
C11 C10 C9 127.4(6) . . ? 
N2 C10 C9 108.0 . . ? 
C10 C11 C10 132.3(11) . 16_565 ? 
C10 C11 C28 113.8(5) . . ? 
C10 C11 C28 113.8(6) 16_565 . ? 
C22 C21 C22 119.5 . 16_565 ? 
C22 C21 C1 120.27(7) . . ? 
C22 C21 C1 120.3 16_565 . ? 
C21 C22 C23 120.0 . . ? 
C21 C22 H22 120.0 . . ? 
C23 C22 H22 120.0 . . ? 
C24 C23 C22 120.0 . . ? 
C24 C23 H23 119.9 . . ? 
C22 C23 H23 120.0 . . ? 
C23 C24 C23 120.00(11) 16_565 . ? 
C23 C24 C27 120.7(3) 16_565 . ? 
C23 C24 C27 119.3(2) . . ? 
O3 C27 O3 120.5(9) . 16_565 ? 
O3 C27 C24 120.2(5) . . ? 
O3 C27 C24 119.3(5) 16_565 . ? 
C27 O3 Zn1 134.2(6) . . ? 
C29 C28 C29 120.4 . 16_565 ? 
C29 C28 C11 119.78(7) . . ? 
C29 C28 C11 119.8 16_565 . ? 
C28 C29 C30 120.0 . . ? 
C28 C29 H29 120.0 . . ? 
C30 C29 H29 120.0 . . ? 
C29 C30 C31 119.9 . . ? 
C29 C30 H30 120.0 . . ? 
C31 C30 H30 120.1 . . ? 
C30 C31 C30 119.99(10) . 16_565 ? 
C30 C31 C34 120.4(2) . . ? 
C30 C31 C34 119.7(3) 16_565 . ? 
O5 C34 O5 120.5(9) . 16_565 ? 
O5 C34 C31 119.5(5) . . ? 
O5 C34 C31 120.0(5) 16_565 . ? 
C34 O5 Zn2 134.7(6) . . ? 
C36 C35 C40 120.0 . . ? 
C36 C35 C6 120.0(3) . . ? 
C40 C35 C6 120.0(3) . . ? 
C37 C36 C35 120.0 . . ? 
C37 C36 C41 120.0 . . ? 
C35 C36 C41 120.0 . . ? 
C36 C37 C38 120.0 . . ? 
C36 C37 H37 120.0 . . ? 
C38 C37 H37 120.0 . . ? 
C39 C38 C37 120.0 . . ? 
C39 C38 C42 120.0 . . ? 
C37 C38 C42 120.0 . . ? 
C40 C39 C38 120.0 . . ? 
C40 C39 H39 120.0 . . ? 
C38 C39 H39 120.0 . . ? 
C39 C40 C35 120.0 . . ? 
C39 C40 C43 120.0 . . ? 
C35 C40 C43 120.0 . . ? 
C36 C41 H41A 109.5 . . ? 
C36 C41 H41B 109.5 . . ? 
H41A C41 H41B 109.5 . . ? 
C36 C41 H41C 109.5 . . ? 
H41A C41 H41C 109.5 . . ? 
H41B C41 H41C 109.5 . . ? 
C38 C42 H42A 109.5 . . ? 
C38 C42 H42B 109.5 . . ? 
H42A C42 H42B 109.5 . . ? 
C38 C42 H42C 109.5 . . ? 
H42A C42 H42C 109.5 . . ? 
H42B C42 H42C 109.5 . . ? 
C40 C43 H43A 109.5 . . ? 
C40 C43 H43B 109.5 . . ? 
H43A C43 H43B 109.5 . . ? 
C40 C43 H43C 109.5 . . ? 
H43A C43 H43C 109.5 . . ? 
H43B C43 H43C 109.5 . . ? 
 
_diffrn_measured_fraction_theta_max    0.988 
_diffrn_reflns_theta_full              30.95 
_diffrn_measured_fraction_theta_full   0.988 
_refine_diff_density_max    0.727 
_refine_diff_density_min   -0.387 
_refine_diff_density_rms    0.117 
_vrf_THETM01_p75tsag2p 
; 
PROBLEM: The value of sine(theta_max)/wavelength is less than 0.550 
RESPONSE: No crystals examined diffracted beyond 1.5 \%A resolution. 
The largest available single crystal was selected for data collection. 
Disordered solvate in the roughly 70% void space of the host framework 
severely limited resolution. 
; 
_vrf_PLAT023_p75tsag2p 
; 
PROBLEM: Resolution (too) Low [sin(th)/Lambda < 0.6].....      36.34 Deg. 
RESPONSE: No crystals examined diffracted beyond 1.5 \%A resolution. 
The largest available single crystal was selected for data collection. 
Disordered solvate in the roughly 70% void space of the host framework 
severely limited resolution. 
; 
_vrf_PLAT201_p75tsag2p 
; 
PROBLEM: Isotropic non-H Atoms in Main Residue(s)       =         38 
RESPONSE: The Zn~4~O clusters of the host framework were well ordered; 
however, the porphyrin links suffered from considerable libration in 
addition to modelled and suspected disorder.  Structural models with 
independent displacement parameters for each atom converged with 
unreasonable values; consequently, isotropic group displacement 
parameters were refined for moieties within the links.  Anisotropic 
displacement parameters were beyond the resolution of these data. 
; 
_vrf_PLAT241_p75tsag2p 
; 
PROBLEM: Check High   U(eq) as Compared to Neighbors ....         N1 
RESPONSE: The porphyrin links suffered from considerable libration in 
addition to modelled and suspected disorder.  All efforts to refine 
more complex disordered models as well as efforts to refine discrete 
framework models in non-isomorphous sub-groups cascading down to F1 
failed to improve the model chemically.  The porphyrin group displacement 
parameter reported for N1, N2, and C1 through C11 suffers from libration of 
the two pyrrole groups in addition to displacement owing to metal disorder. 
As a consequence, displacement parameters increased from the Zn~4~O cluster 
to the benzoate moiety to the porphyrin ring and finally to the mesityl 
moiety.  The mean position of Zn3 seemed more regular than the pyrrole 
rings. 
; 
_vrf_PLAT242_p75tsag2p 
; 
PROBLEM: Check Low    U(eq) as Compared to Neighbors ....        Zn3 
RESPONSE: The porphyrin links suffered from considerable libration in 
addition to modelled and suspected disorder.  All efforts to refine 
more complex disordered models as well as efforts to refine discrete 
framework models in non-isomorphous sub-groups cascading down to F1 
failed to improve the model chemically.  The porphyrin group displacement 
parameter reported for N1, N2, and C1 through C11 suffers from libration of 
the two pyrrole groups in addition to displacement owing to metal disorder. 
As a consequence, displacement parameters increased from the Zn~4~O cluster 
to the benzoate moiety to the porphyrin ring and finally to the mesityl 
moiety.  The mean position of Zn3 seemed more regular than the pyrrole 
rings. 
; 
_vrf_RFACR01_p75tsag2p 
; 
PROBLEM: The value of the weighted R factor is > 0.45 
RESPONSE: No crystals examined diffracted beyond 1.5 \%A resolution. 
The largest available single crystal was selected for data collection. 
Disordered solvate in the roughly 70% void space of the host framework 
severely limited resolution. 
; 
_vrf_PLAT084_p75tsag2p 
; 
PROBLEM: High R2 Value ..................................       0.49 
RESPONSE: No crystals examined diffracted beyond 1.5 \%A resolution. 
The largest available single crystal was selected for data collection. 
Disordered solvate in the roughly 70% void space of the host framework 
severely limited resolution. 
; 
# end Validation Reply Form 
 
_publ_requested_category         CM 
 
_publ_section_references 
; 
 
Spek, A. L. and vad der Sluis, P. (1990).  Acta Cryst. A46, 194-201. 
 
Sheldrick, G.M. (2001).  SHELX-97-2.  Program for crystal structure solution 
and refinement.  Institute fur anorg chemie, G\"ottingen, Germany. 
 
Bruker AXS, Inc.  (2001).  Madison, Wisconsin, USA. 
; 
 
_publ_section_figure_captions 
; 
Figure 1.  SHELXTL (Bruker, 2000) plot showing 15% probability ellipsoids 
for non-H atoms and circles of arbitrary size for H atoms. 
; 
 
_publ_section_exptl_prep 
; 
Crystals were grown from 50:50 vol. % DMF/chlorobenzene.  No crystals 
examined diffracted beyond 1.5 \%A resolution.  The largest available single 
crystal was selected for data collection.  Four frame series were filtered 
for statistical outliers before using SAINT/SADABS (Bruker, 2001) to 
spherically correct for absorption, sort, merge, and scale the combined data.  
No decay correction was applied. 
; 
 
_publ_section_exptl_refinement 
; 
Systematic conditions suggested the ambiguous space group.   Structure 
was solved by direct methods (Sheldrick, 2001).  The proposed model 
includes a disordered position for the Zn3 atom above the plane 
of the porphyrin.  Two-fold symmetry was imposed on the idealized 
porphyrin framework (effective standard deviation 0.01 \%A).  Benzoate, 
pyrrole, and mesityl moieties were refined as rigid idealized groups. 
Positions for solvate atoms were so severely disordered that no discrete 
model for solvate molecules surfaced in difference Fourier maps.  The 
proposed structural model was refined with contributions from the solvate 
molecules removed from the diffraction data using the bypass procedure 
in PLATON (Spek, 1990).  The electron count from the "squeeze" model 
converged in good agreement with the number of solvate molecules 
predicted by TGA results.  The "squeeze" data are reported here.  H atoms 
were included as riding idealized contributors with U's assigned as 1.5 
times Ueq of methyl C atoms and 1.2 times Ueq of aromatic C atoms. The 
space group choice was confirmed by successful convergence of the 
full-matrix least-squares refinement on F^2^ (Sheldrick, 2001).  The 
highest peak in the final difference Fourier map was in the vicinity of 
atom Cl1; the final map had no other significant features.  A final 
analysis of variance between observed and calculated structure factors 
showed dependence on amplitude and resolution. 
; 
 
_publ_contact_author 
; 
Kenneth S. Suslick 
University of Illinois 
School of Chemical Sciences 
600 South Mathews Avenue 
Urbana, Illinois  61801 
USA 
; 
_publ_contact_author_phone        '1  217 333 2794' 
_publ_contact_author_fax          '1  217 333 2685' 
_publ_contact_author_email        ksuslick@uiuc.edu 
_publ_contact_letter 
; 
Please consider this CIF submission for publication as a communication 
in Journal of the American Chemical Society. 
; 
_publ_requested_journal           'J. Amer. Chem. Soc.' 
_publ_requested_coeditor_name     ? 
 
_publ_section_title 
; 
 Robust Microporous Metalloporphyrin Framework Solids 
; 
 
_publ_section_abstract 
; 
 ? 
; 
 
_publ_section_comment 
; 
 ? 
; 
 
_publ_section_acknowledgements 
; 
We thank Yi Gui Gao and Teresa Prussak-Wieckowska for their help in 
mounting and collecting data on the single crystals.  This work was 
supported by the DOE (DEFG0291ER45439) through the Frederick Seitz 
Materials Research Laboratory at the Univeristy of Illinois and in 
part by the NIH (HL25834). 
; 
 
loop_ 
 _publ_author_name 
 _publ_author_address 
'Suslick, Kenneth S.' 
; 
University of Illinois 
School of Chemical Sciences 
600 South Mathews Avenue 
Urbana, Illinois  61801 
USA 
; 
'Wilson, Scott R.' 
; 
University of Illinois 
School of Chemical Sciences, Box 59-1 
505 South Mathews Avenue 
Urbana, Illinois  61801 
USA 
; 
'Smithenry, Dennis W.' 
; 
University of Illinois 
School of Chemical Sciences, Box 46-6 
600 South Mathews Avenue 
Urbana, Illinois  61801 
USA 
; 
 
